# Supplementary material for: Seasonal availability of edible underground and aboveground carbohydrate resources to human foragers on the Cape south coast, South Africa
Source: PeerJ journal article supplement (doi:10.7717/peerj.1679), 2016-02-18

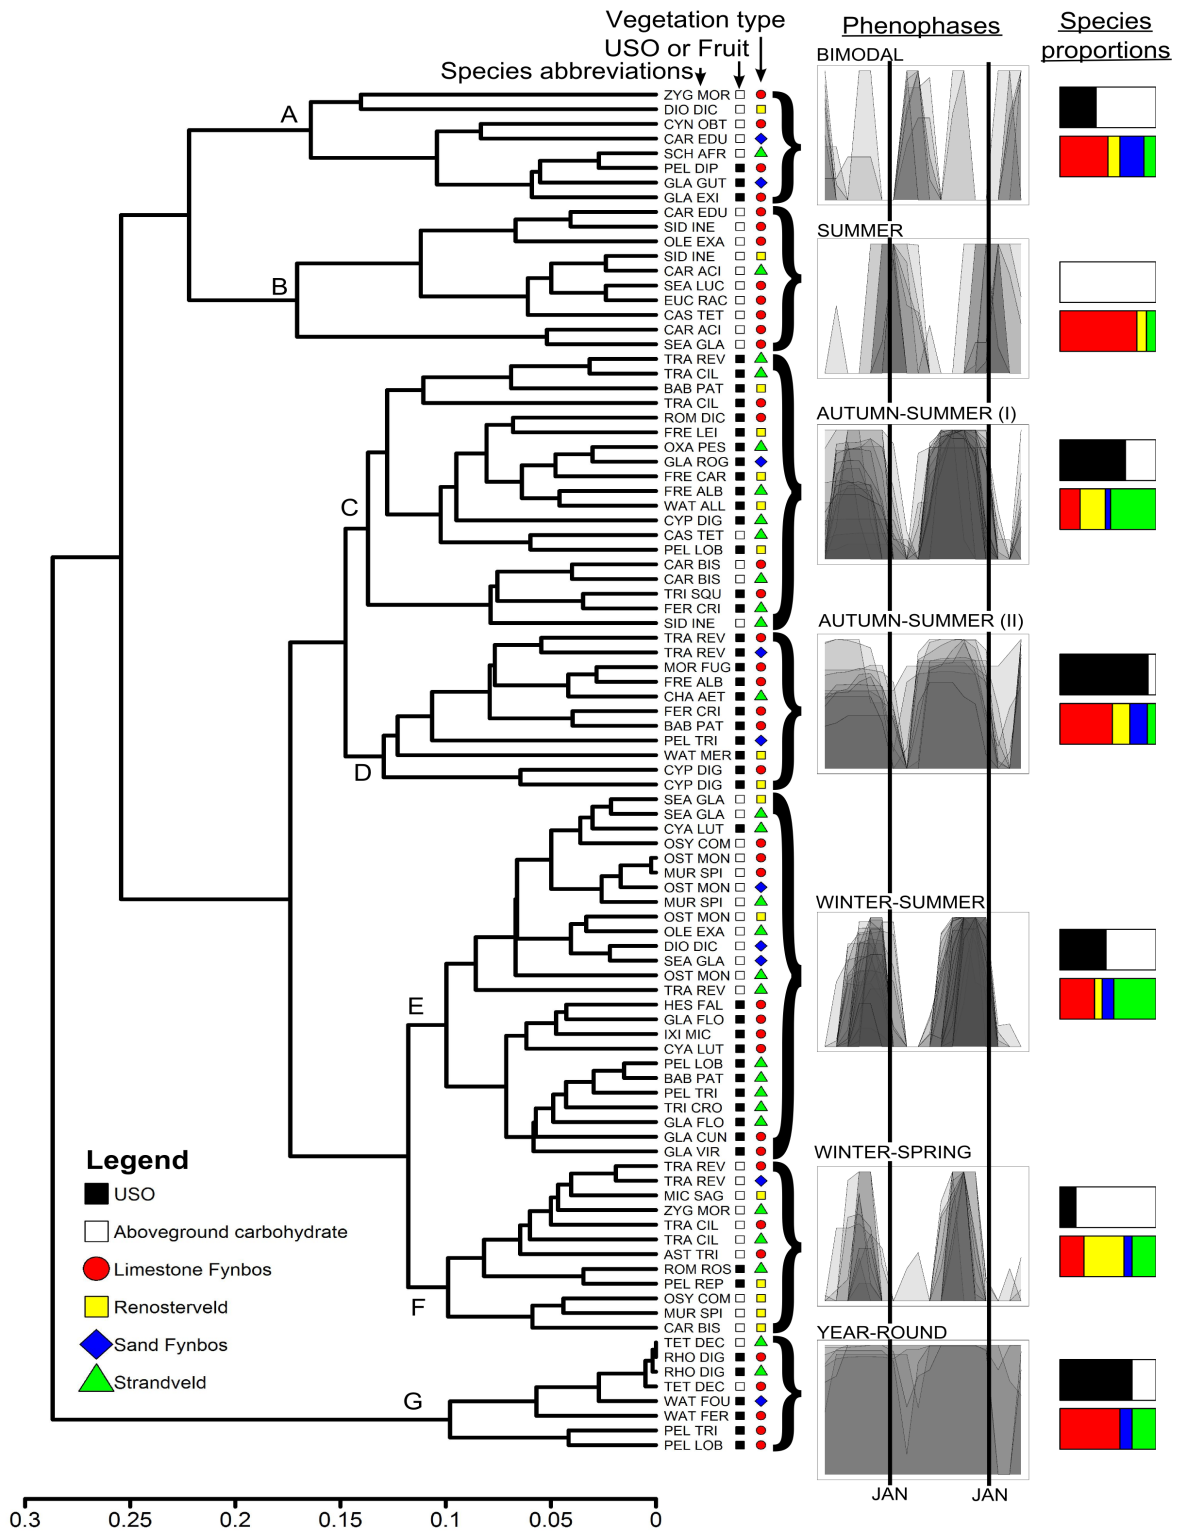

Supplement: Supplemental_Fig._S3.pdf [file Supplemental_Fig._S3.pdf]
